# Supplementary material for: Functional variation among mesenchymal stem cells derived from different tissue sources
Source: PeerJ journal article supplement (doi:10.7717/peerj.17616), 2024-06-28
Supplement: RNASeqpower.docx [file RNASeqpower.docx]

The power of scRNA-seq was evaluated using the R package RNASeqPower (version: 1.40.0, https://bioconductor.org/packages/RNASeqPower/). With parameters set to effect=0.5 and alpha=0.05, the calculated RNASeqPower was 0.9994395.
